# Supplementary material for: Synergistic effect of the Pd–Ni bimetal/carbon nanofiber composite catalyst in Suzuki coupling reaction
Source: Royal Society of Chemistry journal article supplement (doi:10.1039/c8qo01100a), 2018-12-10
Supplement: c8qo01100a1.pdf [file c8qo01100a1.pdf]

# Supporting Information

## **Synergistic effect of the Pd-Ni bimetal/carbon nanofibers composite catalyst in Suzuki coupling reaction**

Guangyang Bao, Jie Bai,\* and Chunping Li



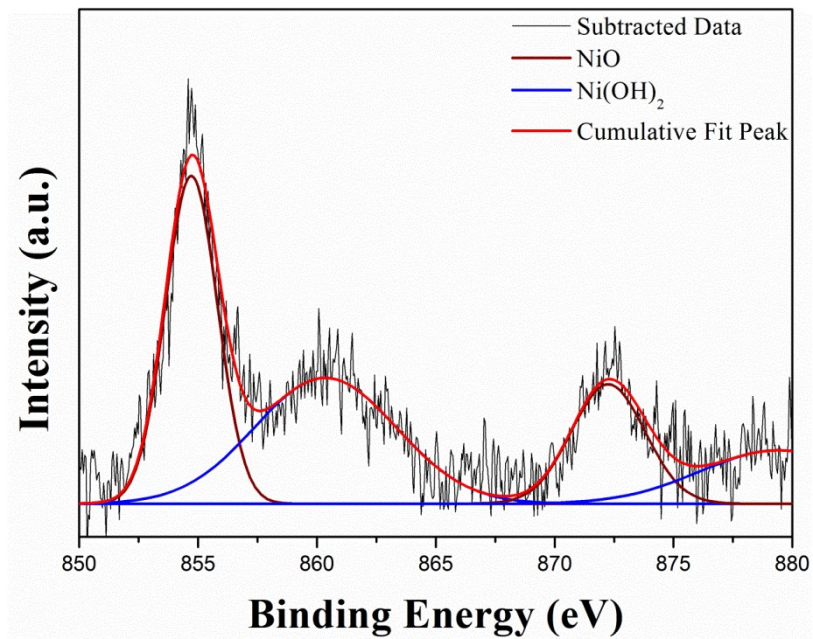

Figure S3. XPS spectrum of the catalyst Ni/CNF.

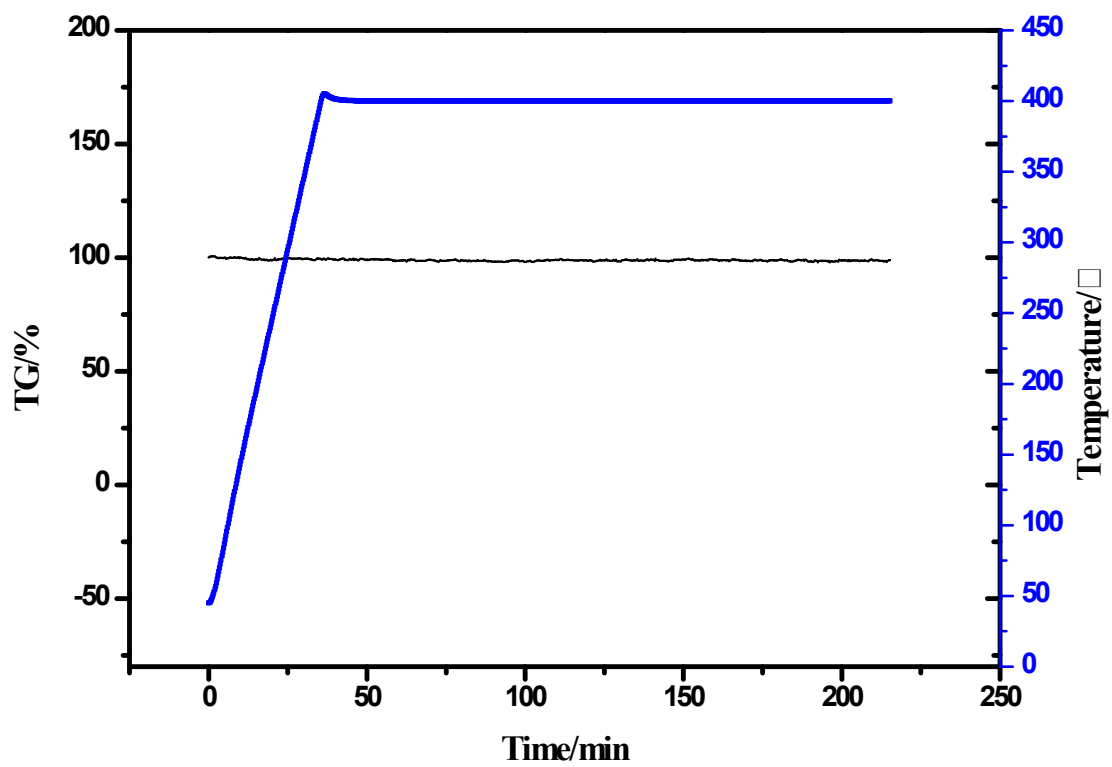

Figure S4. TG curve of the catalyst Pd<sub>1</sub>Ni<sub>4</sub>/CNF

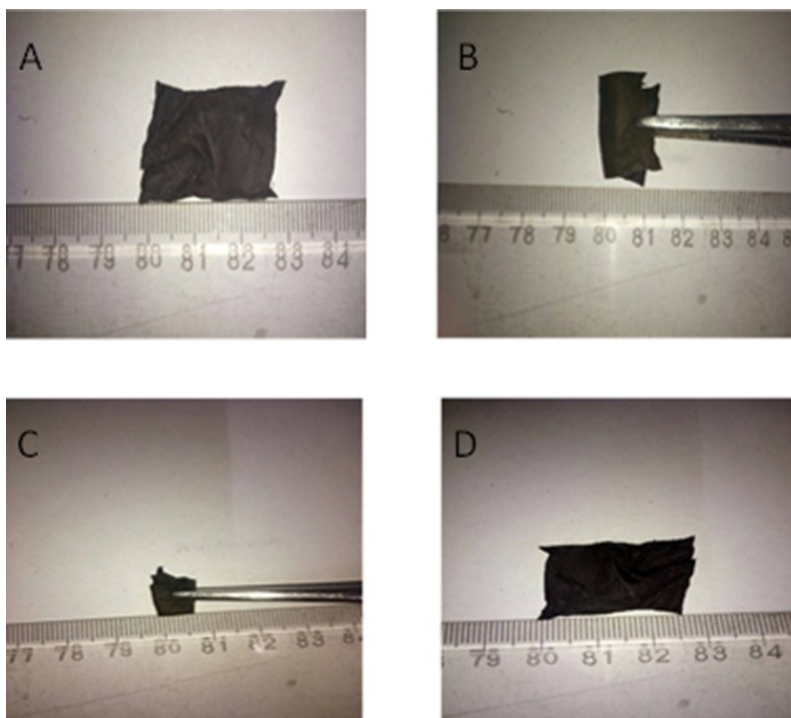

Figure S5. Representative photographs showing the flexibility of the catalyst Pd<sub>1</sub>Ni<sub>4</sub>/CNF sample. A is the initial sample, B and C are the photo of sample folded and D is the unfolded sample.

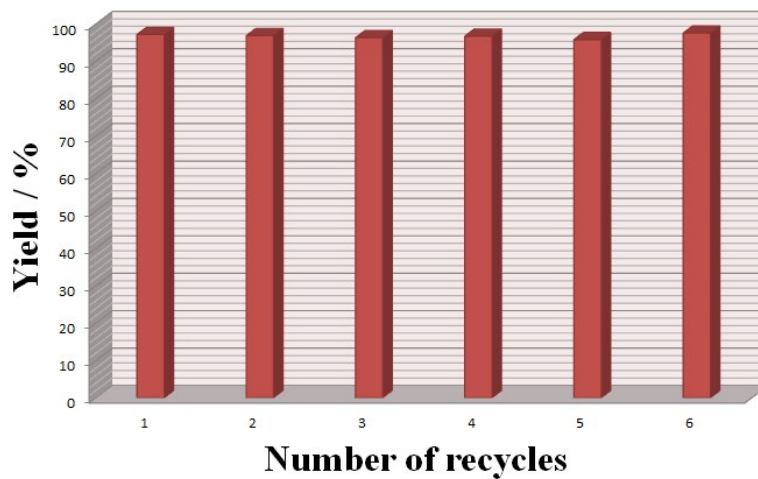

Figure S6. Recycling experiment for Suzuki coupling; Pd<sub>1</sub>Ni<sub>4</sub>/CNF (5 mg), bromobenzene (3 mmol 0.471g), phenylboronic acid (3.3 mmol 0.4023 g), K<sub>2</sub>CO<sub>3</sub> (6 mmol, 0.8292 g), EtOH/H<sub>2</sub>O (8 ml/8 ml), 80°C, 3 h.

**1,1-Biphenyl:**  $^1\text{H}$  NMR (500 MHz, dmsO)  $\delta$  7.65 (d,  $J = 7.0$  Hz, 4H), 7.46 (t,  $J = 7.8$  Hz, 4H), 7.36 (t,  $J = 7.4$  Hz, 2H).  $^{13}\text{C}$  NMR (125 MHz, dmsO)  $\delta$  140.63, 129.38, 127.86, 127.13.

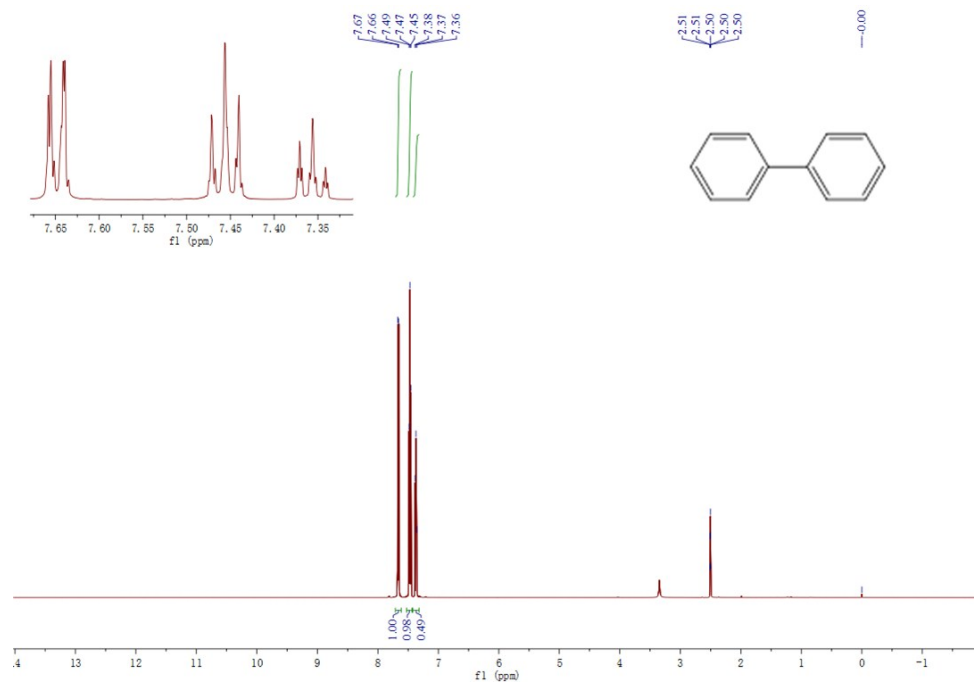

Figure S7-A:  $^1\text{H}$  NMR of 1,1-Biphenyl

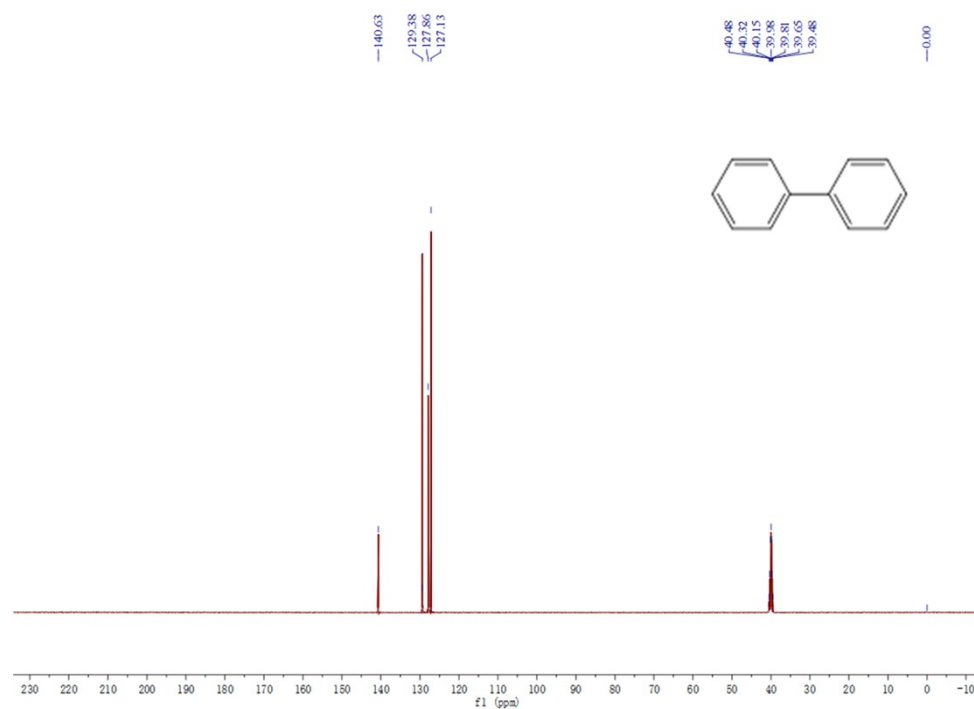

Figure S7-B:  $^{13}\text{C}$  NMR of 1,1-Biphenyl

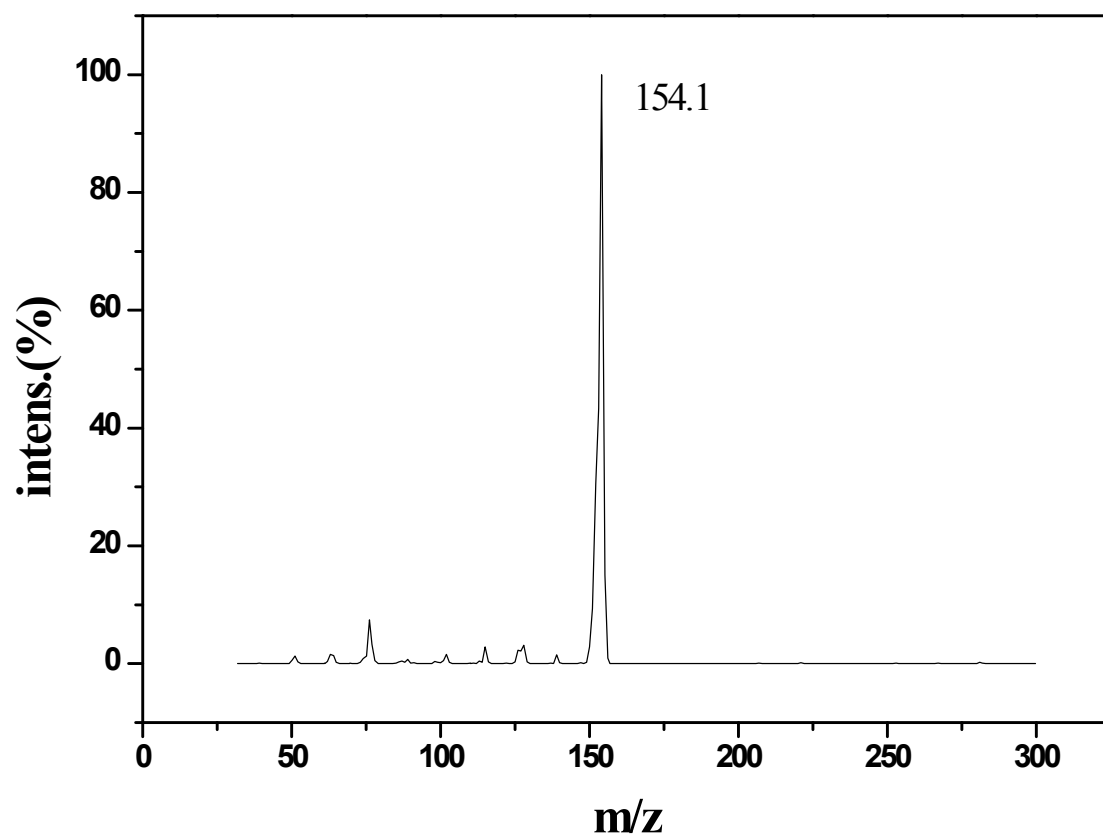

Figure S7-C: mass spectrum of 1,1-Biphenyl

2-Methyl-1,1-Biphenyl:  $^1\text{H}$  NMR (500 MHz, dmsO)  $\delta$  7.43 (t,  $J = 7.6$  Hz, 2H), 7.38 –

7.30 (m, 3H), 7.30 – 7.22 (m, 3H), 7.20 – 7.17 (m, 1H), 2.22 (s, 3H).  $^{13}\text{C}$  NMR (125 MHz, dmso)  $\delta$  141.35, 134.67, 130.32, 129.51, 128.94, 128.21, 127.29, 126.88, 125.93, 20.17.

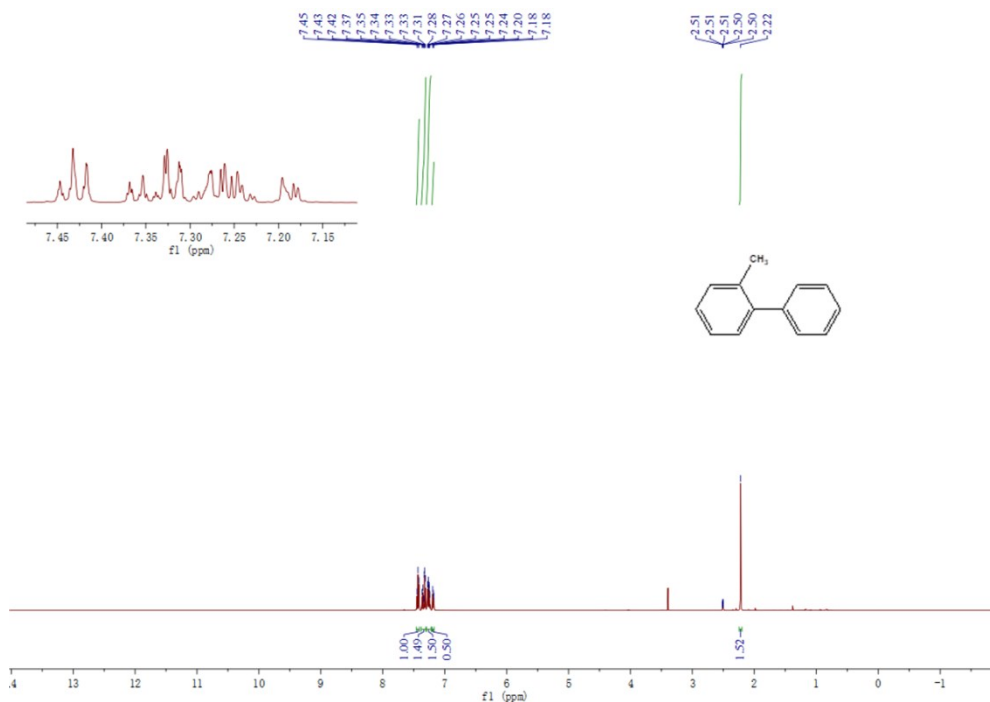

Figure S8-A:  $^1\text{H}$  NMR of 2-Methyl-1,1-Biphenyl

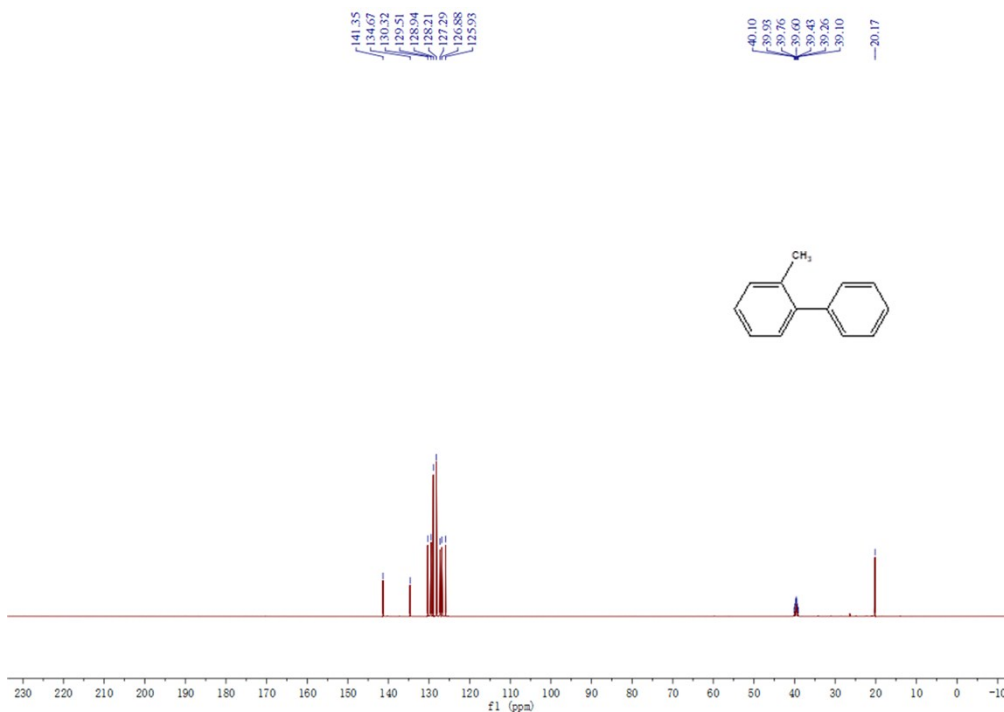

Figure S8-B:  $^{13}\text{C}$  NMR of 2-methyl-1,1-Biphenyl

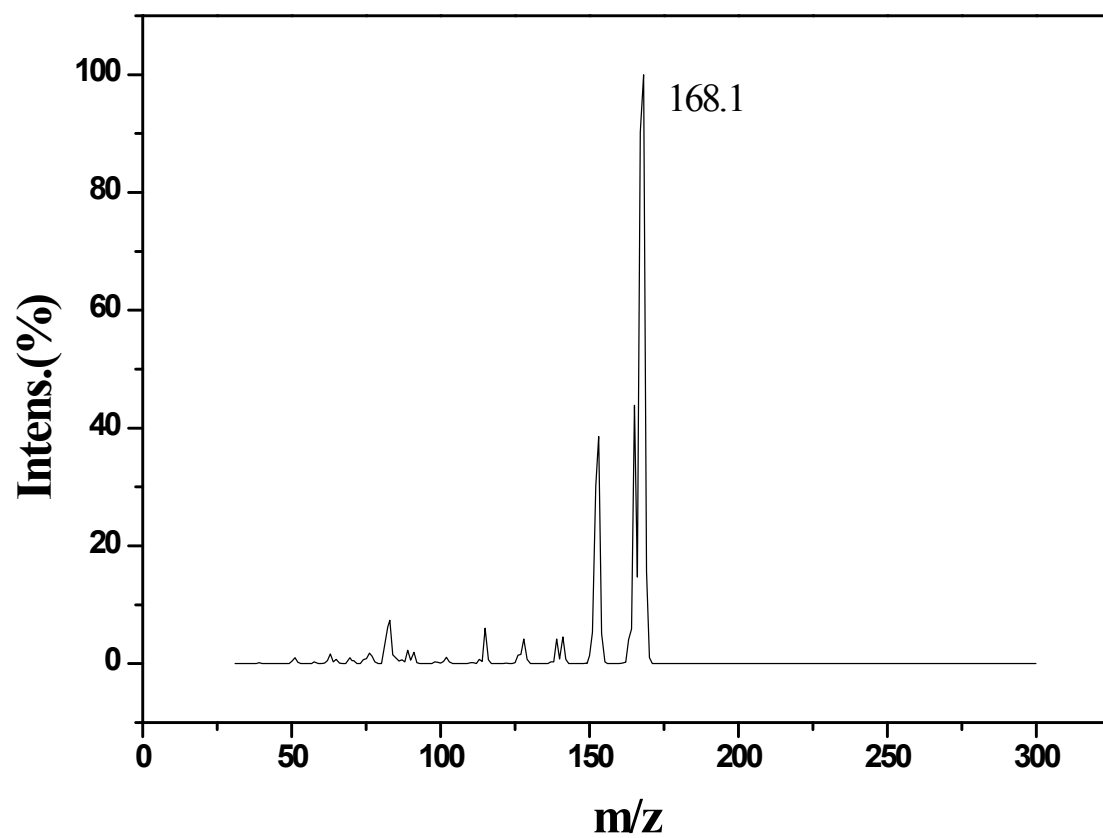

Figure S8-C: mass spectrum of 2-methyl-1,1-Biphenyl

3-Methyl-1,1-Biphenyl:  $^1\text{H}$  NMR (500 MHz, dms $\text{o}$ )  $\delta$  7.63 (d,  $J = 7.9$  Hz, 2H), 7.44 (dd,



$J = 13.7, 5.9$  Hz, 4H), 7.34 (dd,  $J = 14.9, 7.5$  Hz, 2H), 7.16 (d,  $J = 8.1$  Hz, 1H), 2.36 (s, 3H).  $^{13}\text{C}$  NMR (125 MHz, dmsO)  $\delta$  140.65, 140.51, 138.32, 129.14, 129.08, 128.33, 127.65, 127.59, 126.97, 124.11, 21.40.

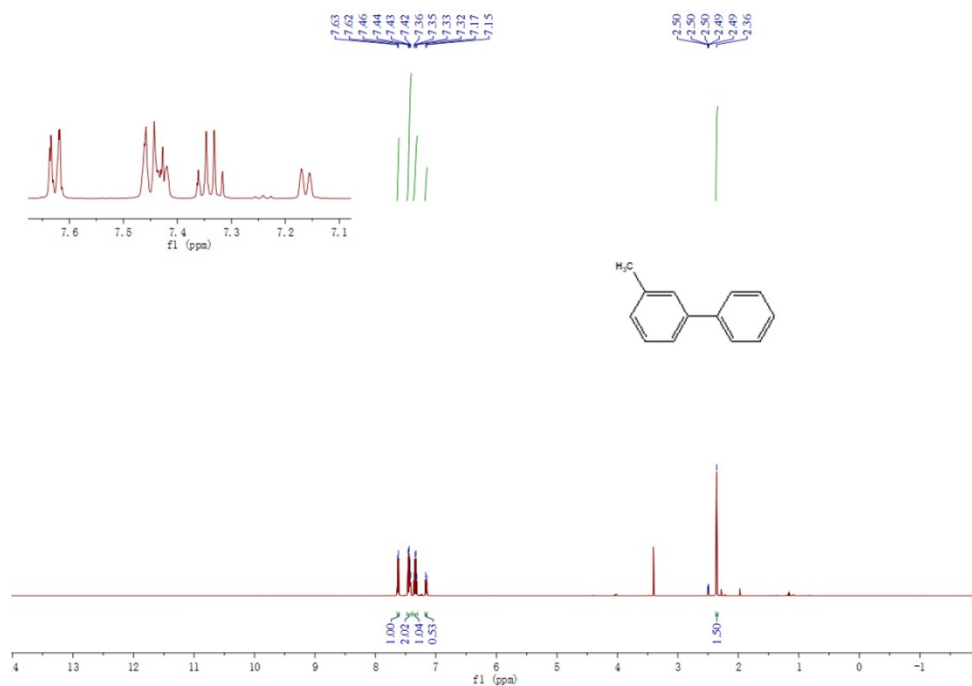

Figure S9-A:  $^1\text{H}$  NMR of 3-Methyl-1,1-Biphenyl

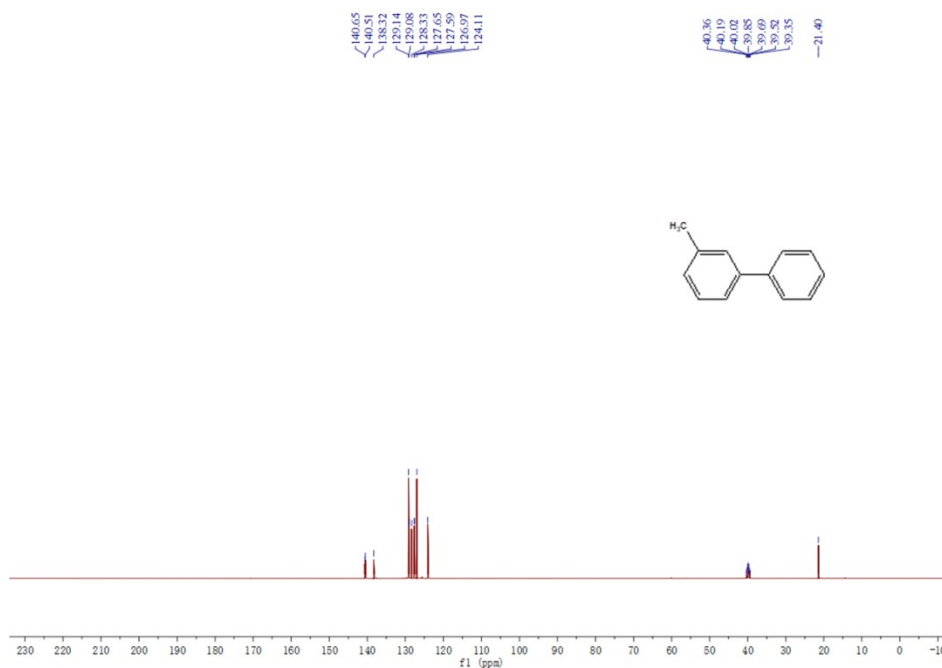

Figure S9-B:  $^{13}\text{C}$  NMR of 3-Methyl-1,1-Biphenyl

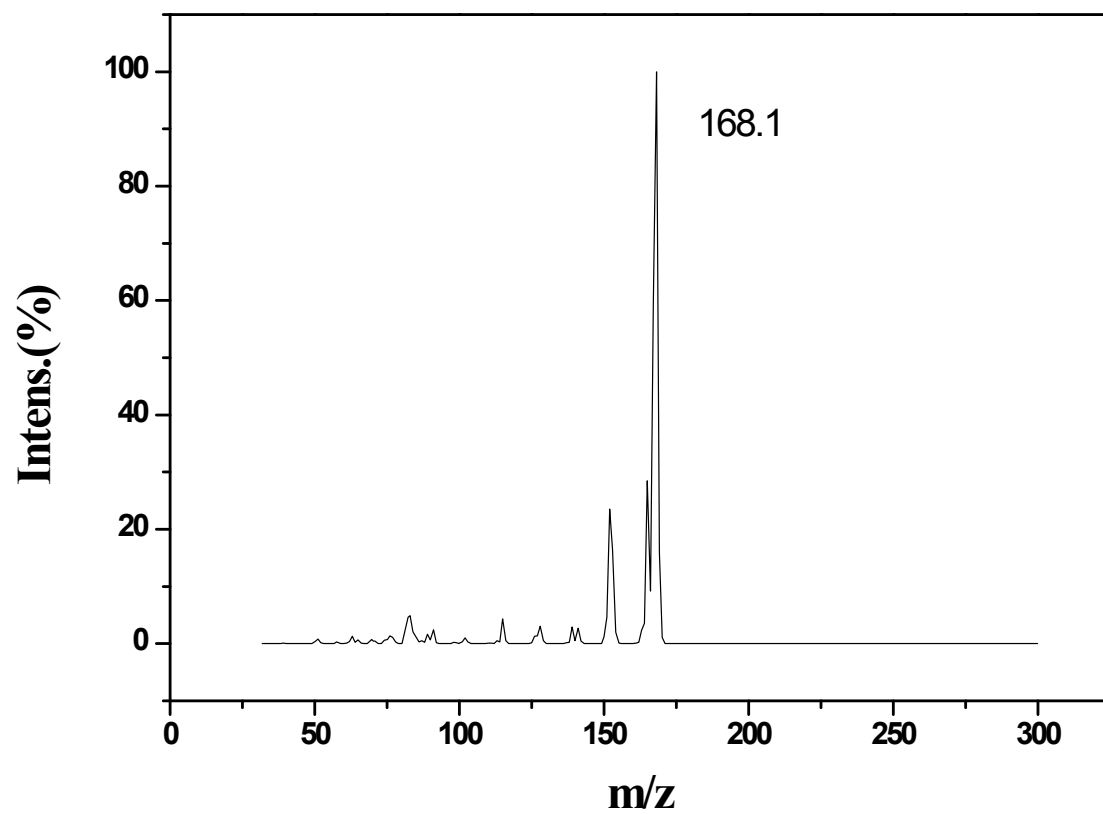

Figure S9-C: mass spectrum of 3-Methyl-1,1-Biphenyl

**4-Methyl-1,1-Biphenyl:**  $^1\text{H}$  NMR (500 MHz, dms $\text{o}$ )  $\delta$  7.64 (d,  $J$  = 7.0 Hz, 1H), 7.56 (d,  $J$  = 8.1 Hz, 1H), 7.45 (t,  $J$  = 7.7 Hz, 1H), 7.34 (t,  $J$  = 7.4 Hz, 1H), 7.28 (d,  $J$  = 7.9 Hz, 1H), 2.35 (s, 2H).  
 $^{13}\text{C}$  NMR (125 MHz, dms $\text{o}$ )  $\delta$  140.08, 137.27, 136.68, 129.50, 128.85, 127.08, 126.48, 126.40, 20.64.

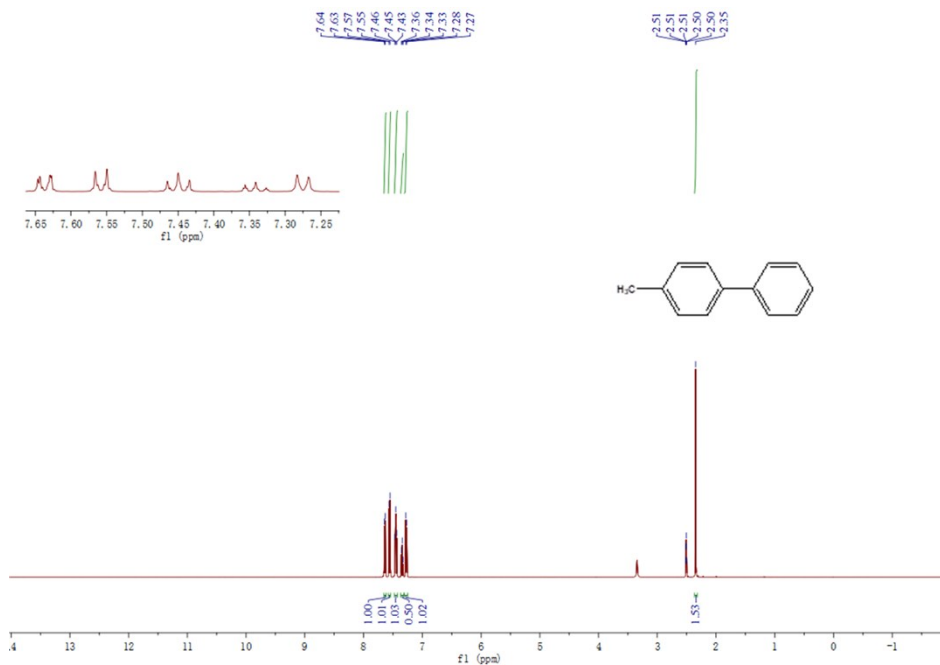

Figure S10-A:  $^1\text{H}$  NMR of 4-Methyl-1,1-Biphenyl

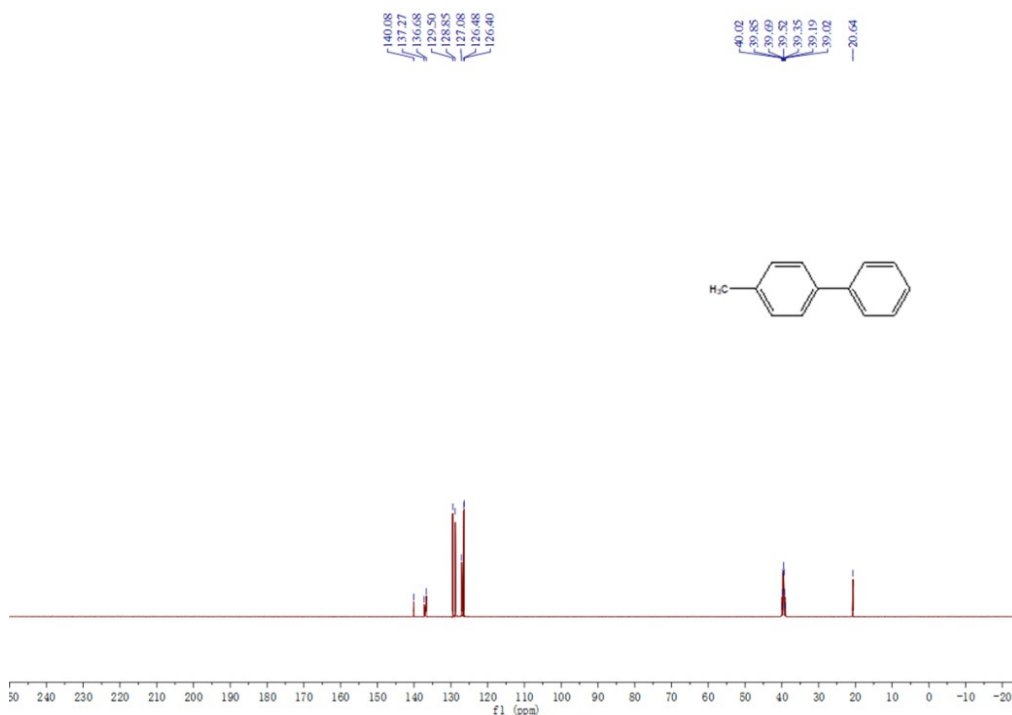

Figure S10-B:  $^{13}\text{C}$  NMR of 4-Methyl-1,1-Biphenyl

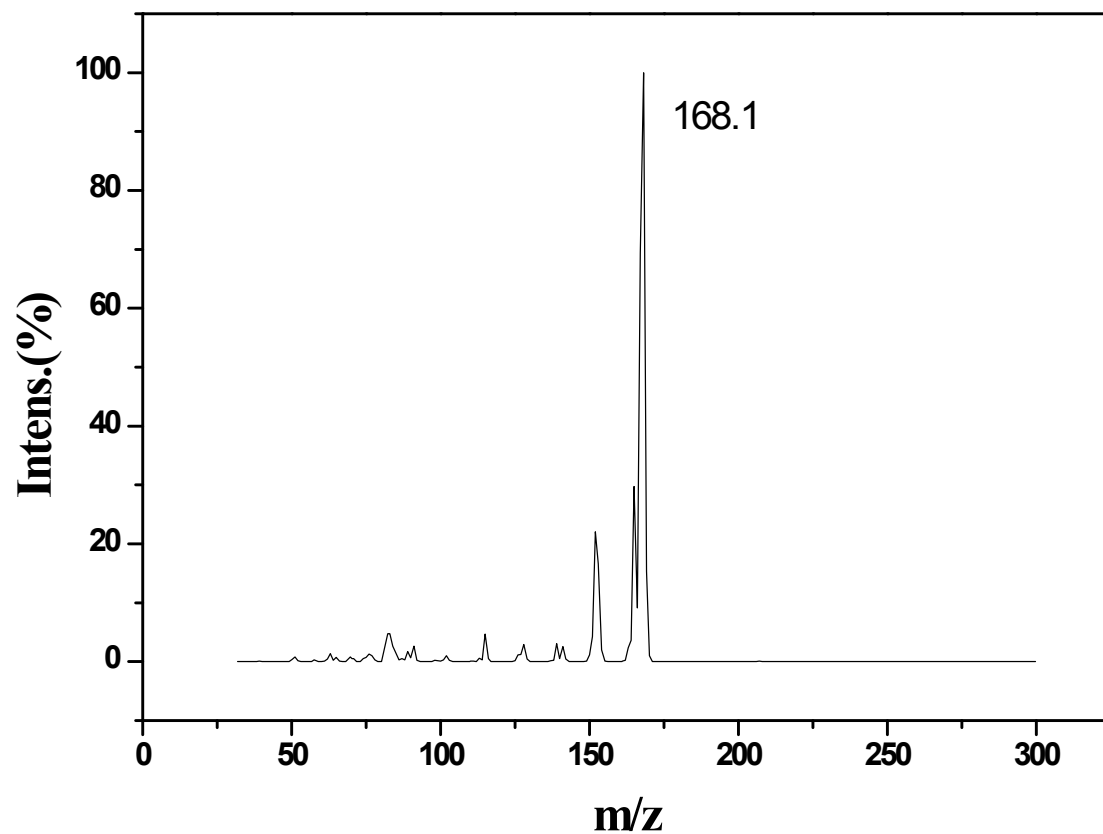

Figure S10-C: mass spectrum of 4-Methyl-1,1-Biphenyl

2-Methoxy-1,1-Biphenyl:  $^1\text{H}$  NMR (500 MHz, dmsO)  $\delta$  7.52 (d,  $J = 7.6$  Hz, 2H), 7.45

(t,  $J = 7.7$  Hz, 2H), 7.41 – 7.31 (m, 3H), 7.16 (d,  $J = 8.3$  Hz, 1H), 7.08 (t,  $J = 7.4$  Hz, 1H), 3.80 (s, 3H).  $^{13}\text{C}$  NMR (125 MHz, dmso)  $\delta$  156.07, 138.18, 130.36, 129.79, 129.22, 128.82, 127.93, 126.75, 120.74, 111.70, 55.41.

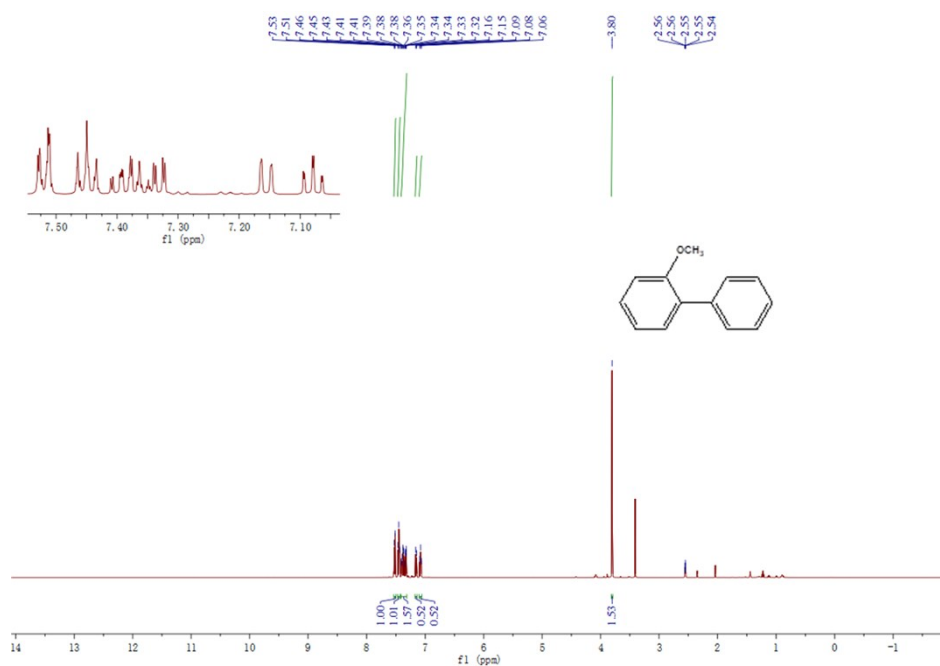

Figure S11-A:  $^1\text{H}$  NMR of 2-Methoxy-1,1-Biphenyl

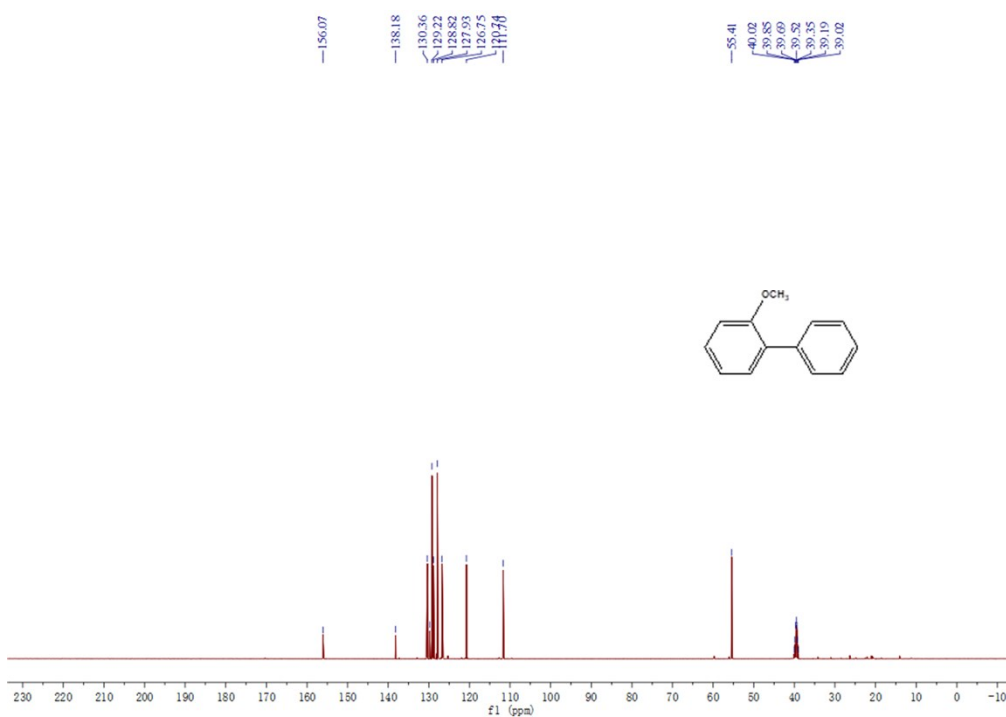

Figure S11-B:  $^{13}\text{C}$  NMR of 2-Methoxy-1,1-Biphenyl

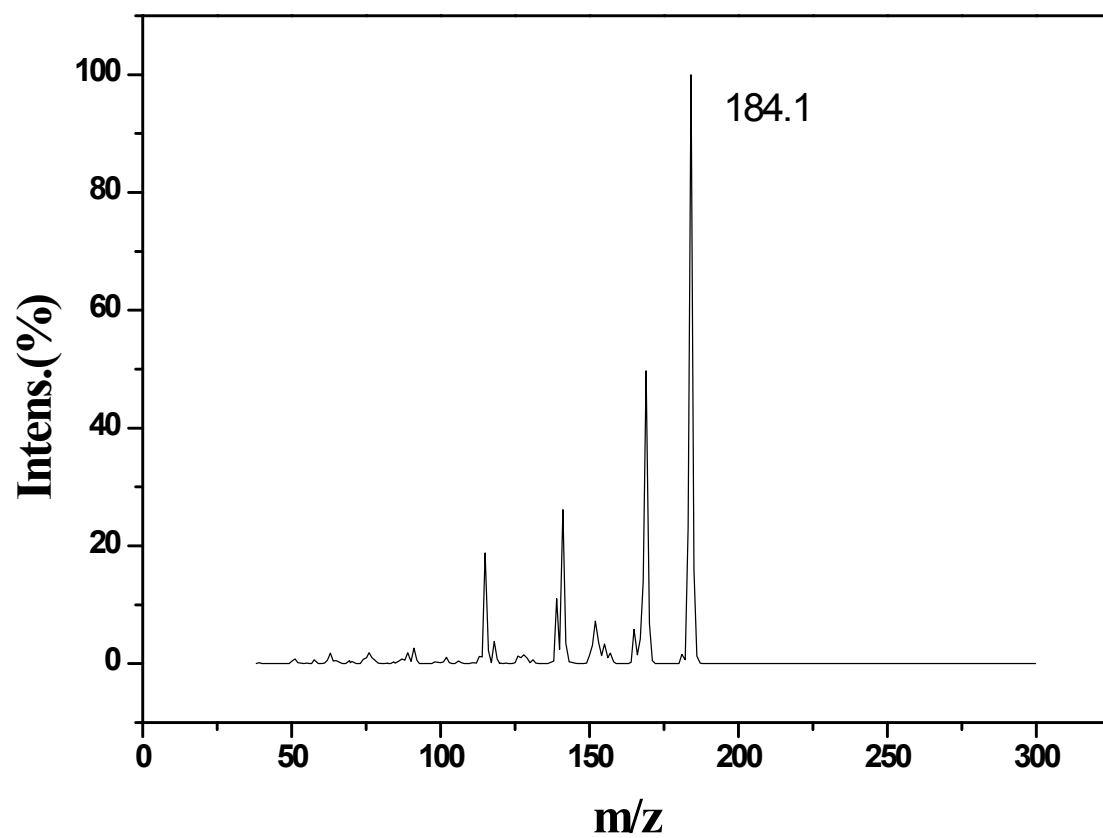

Figure S11-C: mass spectrum of 2-Methoxy-1,1-Biphenyl

3-Methoxy-1,1-Biphenyl:  $^1\text{H}$  NMR (500 MHz, dmso)  $\delta$  7.67 (d,  $J$  = 8.2 Hz, 2H), 7.46 (t,

$J = 7.7$  Hz, 2H), 7.41 – 7.34 (m, 2H), 7.23 (d,  $J = 7.2$  Hz, 2H), 6.98 – 6.93 (m, 1H), 3.83 (s, 3H).  
 $^{13}\text{C}$  NMR (125 MHz, dms $\text{o}$ )  $\delta$  160.30, 142.29, 140.67, 130.45, 129.35, 128.03, 127.31, 119.55, 113.46, 112.78, 55.56.

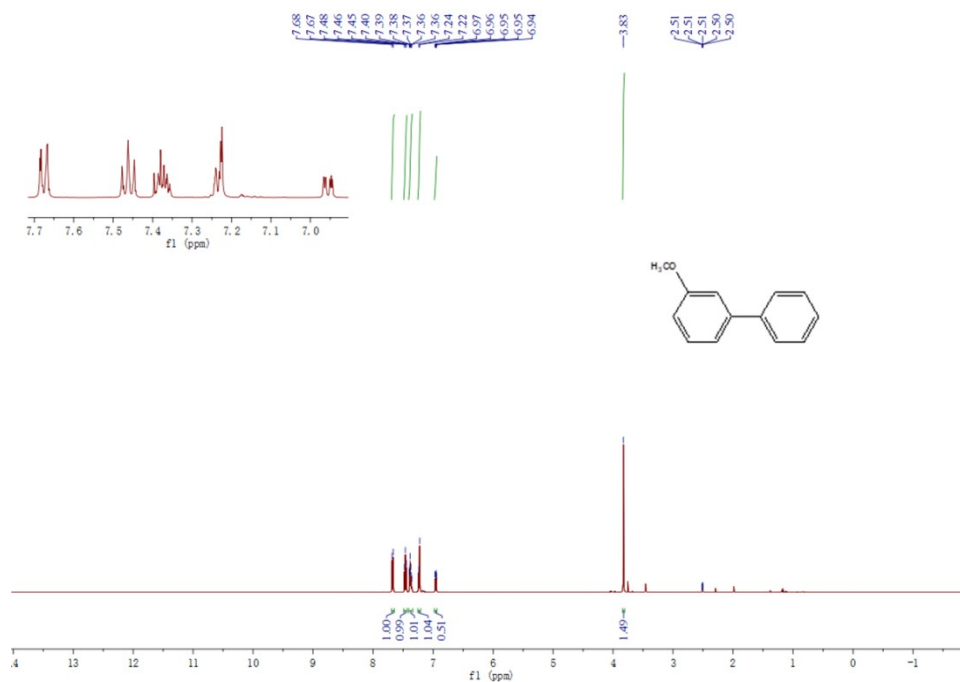

Figure S12-A:  $^1\text{H}$  NMR of 3-Methoxy-1,1-Biphenyl

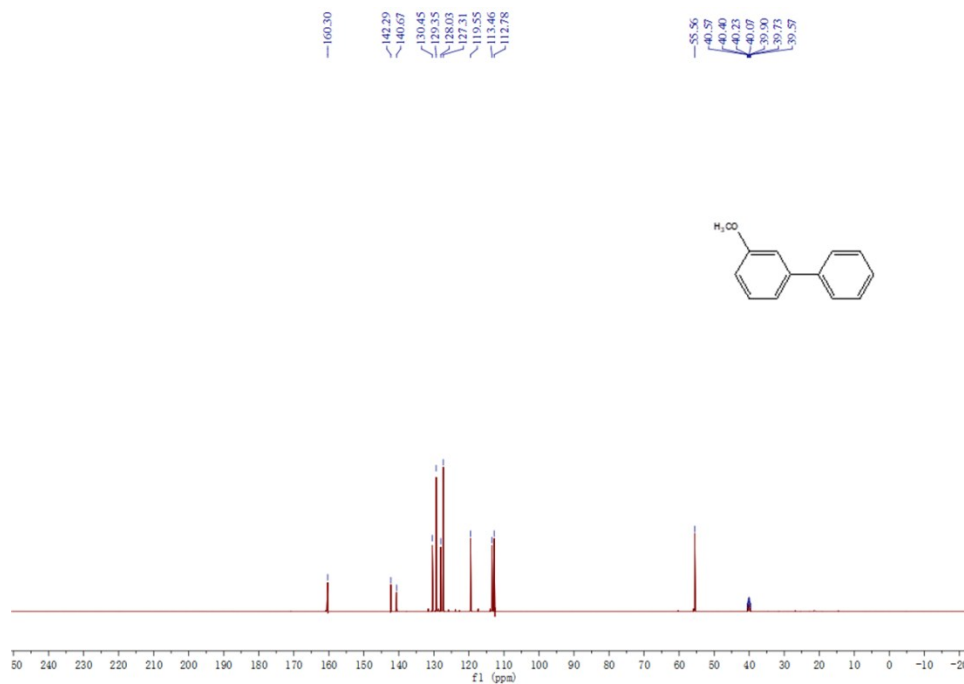

Figure S12-B:  $^{13}\text{C}$  NMR of 3-Methoxy-1,1-Biphenyl

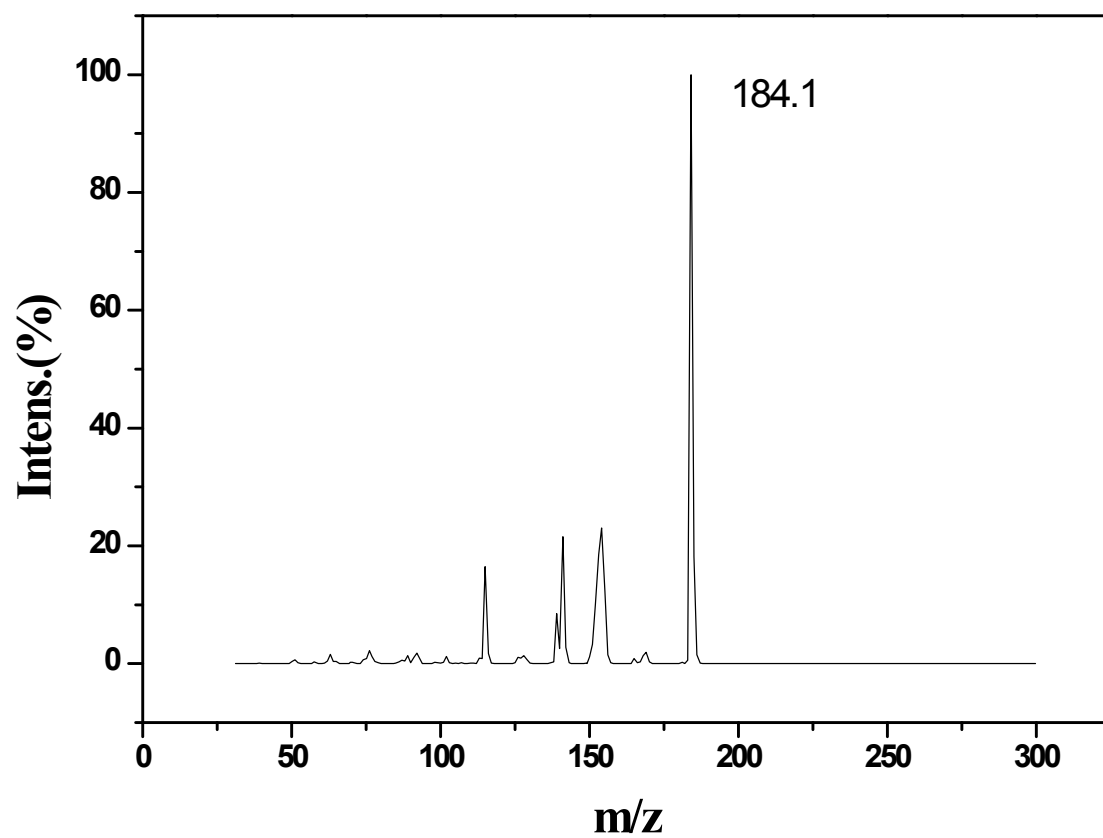

Figure S12-C: mass spectrum of 3-Methoxy-1,1-Biphenyl

4-Methoxy-1,1-Biphenyl:  $^1\text{H}$  NMR (500 MHz, dms $\text{o}$ )  $\delta$  7.63 – 7.59 (m, 4H), 7.43 (t, J



= 7.8 Hz, 2H), 7.31 (t, J = 7.4 Hz, 1H), 7.03 (d, J = 8.8 Hz, 2H), 3.80 (s, 3H). <sup>13</sup>C NMR (125 MHz, dmsO) δ 159.20, 140.15, 132.85, 129.17, 128.06, 127.01, 126.49, 114.68, 55.49.

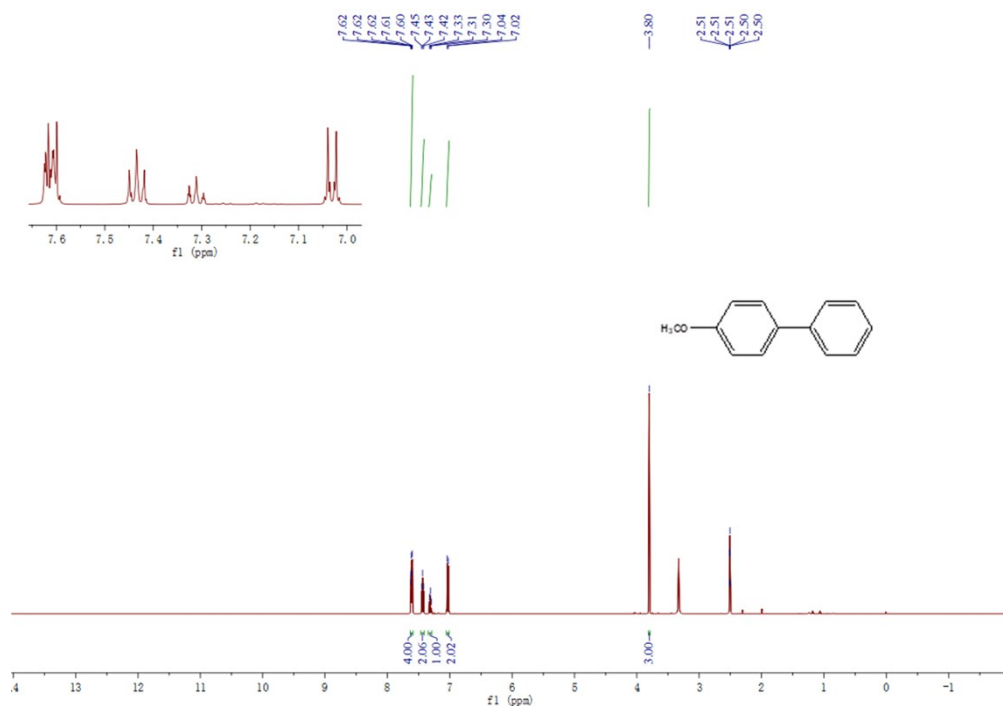

Figure S13-A: <sup>1</sup>H NMR of 4-Methoxy-1,1-Biphenyl

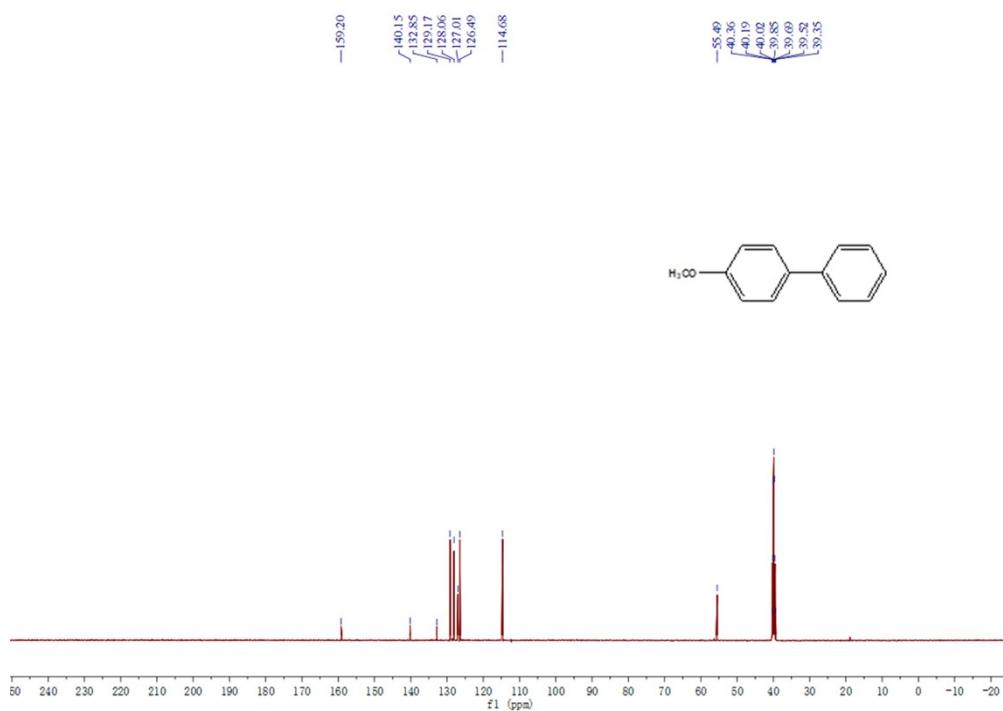

Figure S13-B: <sup>13</sup>C NMR of 4-Methoxy-1,1-Biphenyl

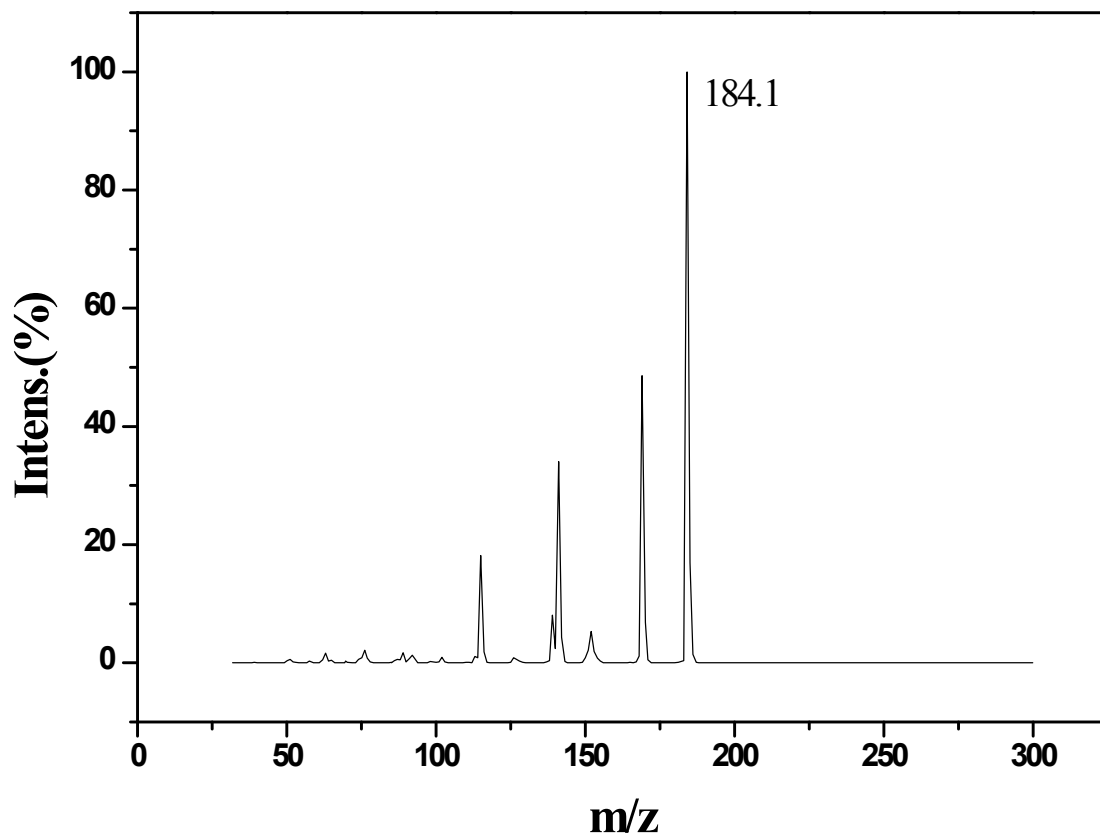

Figure S13-C: mass spectrum of 4-Methoxy-1,1-Biphenyl
